# Supplementary material
Source: publisher site journal article supplement (https://www.spandidos-publications.com/4929/downloadSupplementary)

Figure S1. Results of apoptosis analysis using flow cytometry. SRA01/04 cell at (A) 35.0°C showed 0.28% early apoptosis and 0.47% late apoptosis and at (B) 37.5°C showed 0.47% early apoptosis and 0.56% late apoptosis. iHLEC-NY2 cell at (C) 35.0°C showed 0.05% early apoptosis and 0.05% late apoptosis and at (D) 37.5°C showed 0.09% early apoptosis and 0.08% late apoptosis. GFP, green fluorescent protein; APC, allophycocyanin; iHLEC-NY2, immortalized human lens epithelial cells NY2.

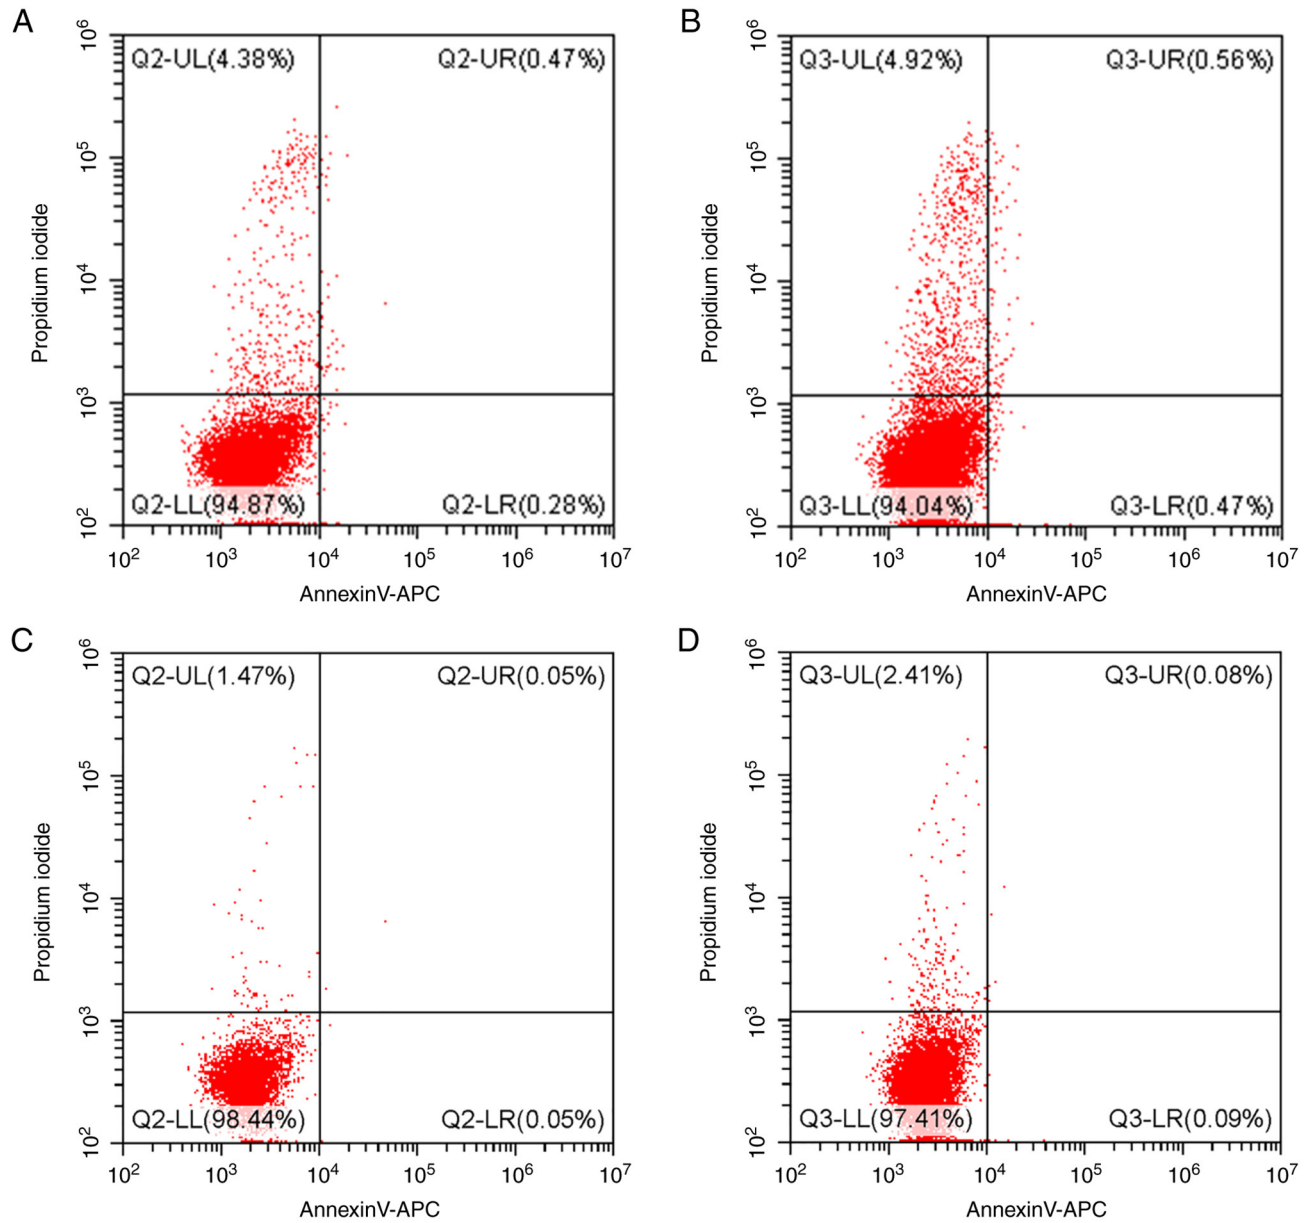

Supplement: Supplementary file [file downloadSupplementary]
